# Supplementary material for: Diminishment of Nrf2 Antioxidative Defense Aggravates Nephrotoxicity of Melamine and Oxalate Coexposure
Source: MDPI journal article supplement (doi:10.3390/antiox10091464), 2021-09-14
Supplement: s1 [file s1]

## Supplementary Materials

### Diminishment of Nrf2 antioxidative defense aggravates nephrotoxicity of melamine and oxalate coexposure

Chia-Fang Wu<sup>1,2,+</sup>, Chia-Chu Liu<sup>1,3-5,+</sup>, Yi-Chun Tsai<sup>1,5,6</sup>, Chu-Chih Chen<sup>1,7</sup>, Ming-Tsang Wu<sup>1,8-10</sup> and Tusty-Jiuan Hsieh<sup>1,11,12,\*</sup>

<sup>1</sup> Research Center for Environmental Medicine, Kaohsiung Medical University, Kaohsiung, Taiwan

<sup>2</sup> International Master Program of Translational Medicine, National United University, Miaoli, Taiwan

<sup>3</sup> School of Medicine, College of Medicine, Kaohsiung Medical University, Kaohsiung, Taiwan

<sup>4</sup> Department of Urology, Kaohsiung Medical University Hospital, Kaohsiung Medical University, Kaohsiung, Taiwan

<sup>5</sup> Department of Urology, Pingtung Hospital, Ministry of Health and Welfare, Pingtung City, Taiwan

<sup>6</sup> Divisions of Nephrology, Kaohsiung Medical University Hospital, Kaohsiung Medical University, Kaohsiung, Taiwan

<sup>7</sup> Institute of Population Health Sciences, National Health Research Institutes, Miaoli, Taiwan

<sup>8</sup> Ph.D. Program of Environmental and Occupational Medicine, College of Medicine, Kaohsiung Medical University, Kaohsiung, Taiwan

<sup>9</sup> Graduate Institute of Clinical Medicine, College of Medicine, Kaohsiung Medical University, Kaohsiung, Taiwan

<sup>10</sup> Department of Family Medicine, Kaohsiung Medical University Hospital, Kaohsiung Medical University, Kaohsiung, Taiwan

<sup>11</sup> Graduate Institute of Medicine, College of Medicine, Kaohsiung Medical University, Kaohsiung, Taiwan

<sup>12</sup> Department of Marine Biotechnology and Resources, College of Marine Sciences, National Sun Yat-Sen University, Kaohsiung, Taiwan

\*Both equal contribution

\* Corresponding author: Tusty-Jiuan Hsieh, Ph.D.

Address: No. 100 Shih-Chuan 1st Rd, Graduate Institute of Medicine, College of Medicine, Kaohsiung Medical University, Kaohsiung 807, Taiwan

E-mail: hsiehjun@kmu.edu.tw

Telephone: +886 7 3121101, ext. 2759#423

ORCID: 0000-0001-5387-6522

## Supplementary Figure

(A)

|           | 2 weeks    | 4 weeks          | Sacrificed |
|-----------|------------|------------------|------------|
| Group I   | R.O. water |                  |            |
| Group II  | Mel-126    |                  |            |
| Group III | R.O. water | 2% HLP           |            |
| Group IV  | Mel-63     | Mel-63 + 2% HLP  |            |
| Group V   | Mel-126    | Mel-126 + 2% HLP |            |

(B)

|           | Animal numbers |         |         |
|-----------|----------------|---------|---------|
|           | Batch 1        | Batch 2 | Batch 3 |
| Group I   | 3              | 4       | 6       |
| Group II  | 0              | 3       | 6       |
| Group III | 3              | 4       | 6       |
| Group IV  | 3              | 4       | 6       |
| Group V   | 3              | 4       | 6       |

**Figure S1.** Scheme of the animal study. (A) Experimental design of the animal study. The Sprague-Dawley male rats were randomly distributed into five groups: Group I (Control); Group II (126 mg/kg/day melamine); Group III (2% HLP); Group IV (63 mg/kg/day melamine + 2% HLP); and Group V (126 mg/kg/day melamine + 2% HLP). For Group II, IV and V, the rats were pre-exposed to melamine in drinking water for 2 weeks and then co-exposed to melamine and HLP in drinking water for another 4 weeks. (B) Animal numbers in each group and batch of the animal study.

## Supplementary Tables

**Table S1. Analysis of urinary sediments in the rats**

| First batch experiment                  |                       |    |    |                      |                      |   |                     |                     |    |                         |    |                         |                         |    |    |                         |    |    |     |
|-----------------------------------------|-----------------------|----|----|----------------------|----------------------|---|---------------------|---------------------|----|-------------------------|----|-------------------------|-------------------------|----|----|-------------------------|----|----|-----|
| Group                                   | I: Control<br>(n = 3) |    |    | II: M-126<br>(n = 0) |                      |   | III: HLP<br>(n = 3) |                     |    | IV: M-63+HLP<br>(n = 3) |    |                         | V: M-126+HLP<br>(n = 3) |    |    |                         |    |    |     |
| Rat Id.                                 | 1                     | 2  | 3  |                      |                      |   | 4                   | 5                   | 6  | 7                       | 8  | 9                       | 10                      | 11 | 12 |                         |    |    |     |
| CO                                      | –                     | –  | 1+ |                      |                      |   | –                   | –                   | 1+ | –                       | 1+ | 2+                      | 2+                      | 2+ | 3+ |                         |    |    |     |
| AR (AP)                                 | –                     | 1+ | –  |                      |                      |   | –                   | –                   | –  | 1+                      | –  | –                       | –                       | –  | –  |                         |    |    |     |
| TP                                      | –                     | –  | –  |                      |                      |   | 2+                  | 2+                  | –  | 1+                      | –  | –                       | –                       | –  | –  |                         |    |    |     |
| Incidence<br>of CO in<br>urine          | 1/3                   |    |    |                      |                      |   | 1/3                 |                     |    | 2/3                     |    |                         | 3/3                     |    |    |                         |    |    |     |
| Second batch experiment                 |                       |    |    |                      |                      |   |                     |                     |    |                         |    |                         |                         |    |    |                         |    |    |     |
| Group                                   | I: Control<br>(n = 4) |    |    |                      | II: M-126<br>(n = 3) |   |                     | III: HLP<br>(n = 4) |    |                         |    | IV: M-63+HLP<br>(n = 4) |                         |    |    | V: M-126+HLP<br>(n = 4) |    |    |     |
| Rat Id.                                 | 2                     | 3  | 4  | 5                    | 7                    | 8 | 9                   | 11                  | 12 | 13                      | 14 | 16                      | 17                      | 18 | 19 | 21                      | 22 | 23 | 24  |
| CO                                      | –                     | –  | –  | –                    | 1+                   | – | –                   | –                   | –  | –                       | –  | 2+                      | 2+                      | –  | 1+ | 2+                      | 3+ | 1+ | –   |
| AR (AP)                                 | –                     | –  | –  | –                    | –                    | – | –                   | –                   | –  | –                       | –  | –                       | –                       | –  | –  | –                       | –  | –  | –   |
| TP                                      | 2+                    | 1+ | 1+ | –                    | –                    | – | –                   | 1+                  | 1+ | 1+                      | –  | –                       | –                       | 1+ | 1+ | –                       | –  | 1+ | +/- |
| Incidence<br>of CO in<br>urine          | 0/4                   |    |    |                      | 1/3                  |   |                     | 0/4                 |    |                         |    | 3/4                     |                         |    |    | 3/4                     |    |    |     |
| Total<br>incidence<br>of CO in<br>urine | 1/7                   |    |    |                      | 1/3                  |   |                     | 1/7                 |    |                         |    | 5/7                     |                         |    |    | 6/7                     |    |    |     |

Mel-126: 126 mg/kg/day melamine; HLP: 2% hydroxy-L-proline; Mel-63+HLP: 63 mg/kg/day melamine + 2% hydroxy-L-proline; Mel-126+HLP: 126 mg/kg/day melamine + 2% hydroxy-L-proline; Rat Id: identification of rats.

CO: Calcium oxalate; AP: Amorphous phosphate; AR: Amorphous urate; TP: Triple phosphate.

The result was analyzed by an experience medical laboratory technologist who was blinded to the study design.

The frequency of sediments presented in 10 fields under a microscope (100×): 25% = 1+; 50% = 2+; 75% = 3+

Note: The rats that assigned Id. 1, 6, 10, 15 and 20 were removed from this study for the other research purpose.

**Table S2. Purchase information for antibodies**

| Antibody                                           | Catalog No. | Supplier                                                    |
|----------------------------------------------------|-------------|-------------------------------------------------------------|
| Cluster of differentiation 68 (CD68, ED-1)         | ab31630     | Abcam Plc.,<br>Cambridge, MA,<br>USA                        |
| Collagen IV                                        | ab6586      |                                                             |
| Transforming growth factor beta 1 (TGF- $\beta$ 1) | ab92486     |                                                             |
| Kidney injury molecule 1 (KIM-1)                   | OACD04979   | Aviva Systems<br>Biology Corporation,<br>San Diego, CA, USA |
| Caspase-3                                          | #9662       | Cell Signaling<br>Technology, Danvers,<br>MA, USA           |
| Cleaved-caspase-3 (Asp175)                         | #9661       |                                                             |
| NAD(P)H dehydrogenase quinone 1 (NQO1)             | #62262      |                                                             |
| Nuclear factor-kappa B (NF- $\kappa$ B) p65        | #8242       |                                                             |
| Phospho-NF- $\kappa$ B p65                         | #3033       |                                                             |
| Heme oxygenase 1 (HO1)                             | ADI-SPA-895 | Enzo Life Sciences,<br>Inc., Farmingdale,<br>NY, USA        |
| 8-oxoguanine glycosylase 1 (OGG1)                  | GTX20204    | GeneTex, Inc., Irvine,<br>CA, USA                           |
| Beta actin                                         | GTX109639   |                                                             |
| Malondialdehyde (MDA)                              | GTX12835    |                                                             |
| Superoxide dismutase 1 (SOD1)                      | GTX100659   |                                                             |
| Superoxide dismutase 2 (SOD2)                      | GTX116093   |                                                             |
| 8-oxo-2'-deoxyguanosine (8-OHdG)                   | N45.1       | JalCA, Fukuroi,<br>Shizuoka, Japan                          |
| Nuclear factor (erythroid-derived 2)-like 2 (Nrf2) | NBP1-32822  | Novus Biologicals<br>LCC., Centennial,<br>CO, USA           |
| Kelch-like ECH-associated protein 1 (Keap1)        | MAB3024     | R&D Systems, Inc.,<br>Minneapolis, MN,<br>USA               |
| Catalase                                           | sc-50508    | Santa Cruz<br>Biotechnology, Inc.,<br>Dallas, TX, USA       |
| Histone 3                                          | sc-10809    |                                                             |

**Table S3. Clinical biochemical parameters from the rats**

|                                 | Control<br>(n=10) |       | Mel-126<br>(n=9) |      | HLP<br>(n=10) |       | Mel-63+HLP<br>(n=10) |       | Mel-126+HLP<br>(n=10) |      |         |
|---------------------------------|-------------------|-------|------------------|------|---------------|-------|----------------------|-------|-----------------------|------|---------|
|                                 | Mean              | SE    | Mean             | SE   | Mean          | SE    | Mean                 | SE    | Mean                  | SE   | p value |
| Body weight (g)                 | 495.1             | 14.49 | 477.6            | 9.89 | 478.3         | 11.43 | 495.2                | 11.73 | 481.1                 | 8.43 | 0.6567  |
| Water intake (ml)               | 51.23             | 0.72  | 46.31            | 1.73 | 51.15         | 0.20  | 52.14                | 0.22  | 47.12                 | 1.14 | <0.001  |
| Urine amount (ml)               | 16.55             | 0.84  | 16.83            | 1.12 | 20.40         | 1.14  | 26.90                | 2.98  | 25.30                 | 2.80 | 0.0014  |
| Serum CREA (mg/dl)              | 0.23              | 0.02  | 0.25             | 0.01 | 0.24          | 0.01  | 0.24                 | 0.01  | 0.24                  | 0.02 | 0.9016  |
| Serum BUN (mg/dl)               | 14.87             | 0.78  | 16.55            | 0.82 | 13.84         | 0.73  | 15.50                | 0.53  | 18.10                 | 0.93 | 0.0033  |
| Serum UA (mg/dl)                | 3.71              | 1.04  | 4.66             | 0.75 | 5.35          | 1.11  | 6.59                 | 0.71  | 5.48                  | 0.91 | 0.2728  |
| Serum P (mg/dl)                 | 8.56              | 0.34  | 9.78             | 0.65 | 11.87         | 0.96  | 11.41                | 0.21  | 10.30                 | 0.49 | 0.0017  |
| Serum Ca (mg/dl)                | 11.07             | 0.54  | 11.73            | 0.45 | 12.20         | 0.48  | 13.16                | 0.29  | 13.22                 | 0.25 | 0.0021  |
| Urine Ox ( $\mu$ mol/day)#      | 51.84             | 4.37  | 55.39            | 4.26 | 77.88         | 5.92  | 93.52                | 10.95 | 80.14                 | 7.44 | 0.0012  |
| Urine CREA (mg/day)             | 11.27             | 0.77  | 13.25            | 0.55 | 14.12         | 0.77  | 15.95                | 1.35  | 15.27                 | 1.10 | 0.0118  |
| Urine BUN (g/day)               | 0.47              | 0.04  | 0.50             | 0.03 | 0.53          | 0.03  | 0.64                 | 0.07  | 0.62                  | 0.05 | 0.0400  |
| Urine NAG ( $\mu$ g/day)        | 7.56              | 1.60  | 5.70             | 1.08 | 20.44         | 4.89  | 17.79                | 4.68  | 14.90                 | 1.78 | 0.0015  |
| Urine $\beta$ 2M ( $\mu$ g/day) | 1.45              | 0.45  | 2.15             | 0.77 | 0.71          | 0.10  | 1.79                 | 0.44  | 0.73                  | 0.10 | 0.0879  |

Mel-126: 126 mg/kg/day melamine; HLP: 2% hydroxy-L-proline; Mel-63+HLP: 63 mg/kg/day melamine + 2% hydroxy-L-proline; Mel-126+HLP: 126 mg/kg/day melamine + 2% hydroxy-L-proline; SE: standard error; CREA: creatinine; BUN: blood urea nitrogen; UA: uric acid; P: phosphorus; Ca: calcium; Ox: oxalate; NAG: N-acetyl- $\beta$ -D-glucosaminidase;  $\beta$ 2M: Beta-2-microglobulin.

Data combined from the second and the third batch animal experiments.

#Note: n=6 for each group (only measured in rats from the third batch animal experiment)

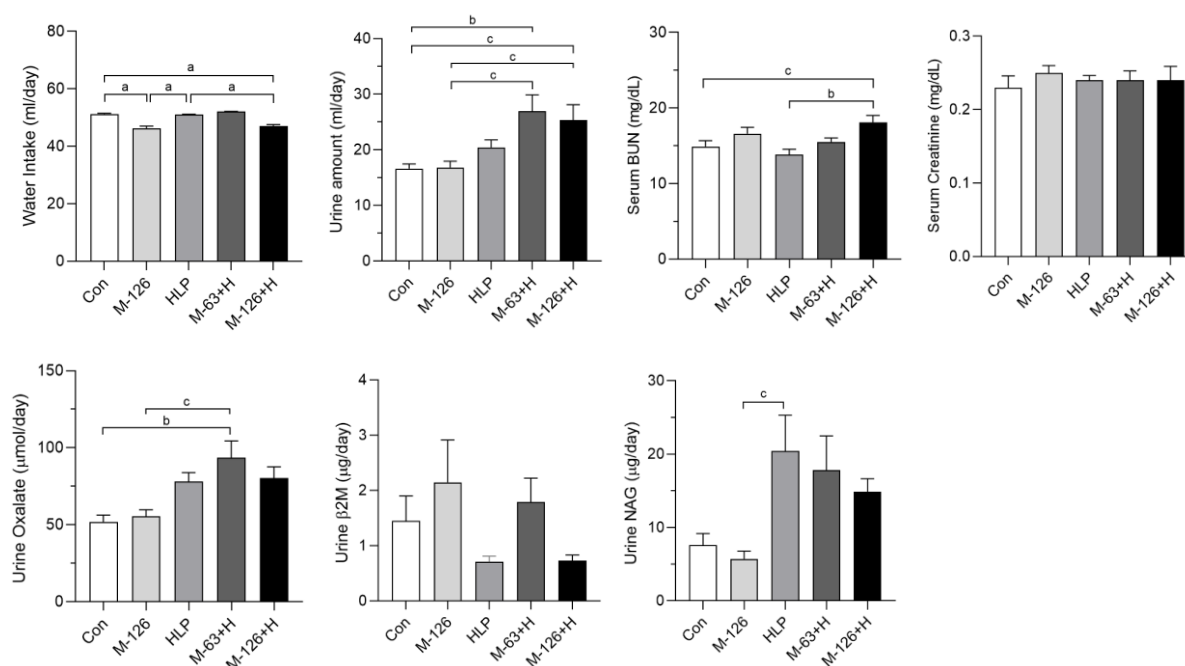

**Supplementary Figure: The statistic results of between-group comparisons for the clinical biochemical parameters from Table S3.**

Con: control; HLP or H: 2% hydroxy-L-proline; M-126: 126 mg/kg/day melamine; M-63: 63 mg/kg/day melamine. One-way analysis of variance (ANOVA) followed by Tukey's multiple comparison test was used to analyze the differences across groups. Data are mean  $\pm$  SE. a:  $p<0.05$ ; b:  $p<0.01$ ; c:  $p<0.001$ .
